# Supplementary material for: Low-dose testosterone administration and estrogen synthase availability in the female brain
Source: Research Square preprint supplement (doi:10.21203/rs.3.rs-5901686/v1), 2025-02-04
Supplement: Supplementary file 1 [file ed93ff60d8652893bf19565a.docx]

**Supplement to: Low-dose testosterone administration and estrogen synthase availability in the female brain**

| **Spearman correlations** | **Post-treatment Thalamus BPND** | **Post-treatment Hypothalamus BPND** | **Post-treatment Amygdala BPND** |
| --- | --- | --- | --- |
| **Post-treatment T** | *ρ* = 0.0, *p* = 1.0 | *ρ* = 0.2, *p* = 0.5 | *ρ* = -0.6, *p* = 0.1 |

**Table S1. Association between the post-treatment peripheral testosterone levels and the post-treatment estrogen synthase availability.** Spearman rho (*ρ*) and *p* values are presented, illustrating the relationship between the serum testosterone concentrations (T) and the [11C]cetrozole binding (BPND) following one-week of transdermal testosterone treatment.

| **Spearman correlations** | **Change in Thalamus BPND** | **Change in Hypothalamus BPND** | **Change in Amygdala BPND** |
| --- | --- | --- | --- |
| **Change in T** | *ρ* = -0.2, *p* = 0.6 | *ρ* = 0.6, *p* = 0.1 | *ρ* = -0.1, *p* = 0.7 |

**Table S2. Association between the pre- to post-treatment change in peripheral testosterone levels and the change in estrogen synthase availability.** Spearman rho (ρ) and *p* values are presented, illustrating the relationship between the change in serum testosterone concentrations (T) and the change in [11C]cetrozole binding (BPND) from the pre-treatment to the post-treatment scanning session.


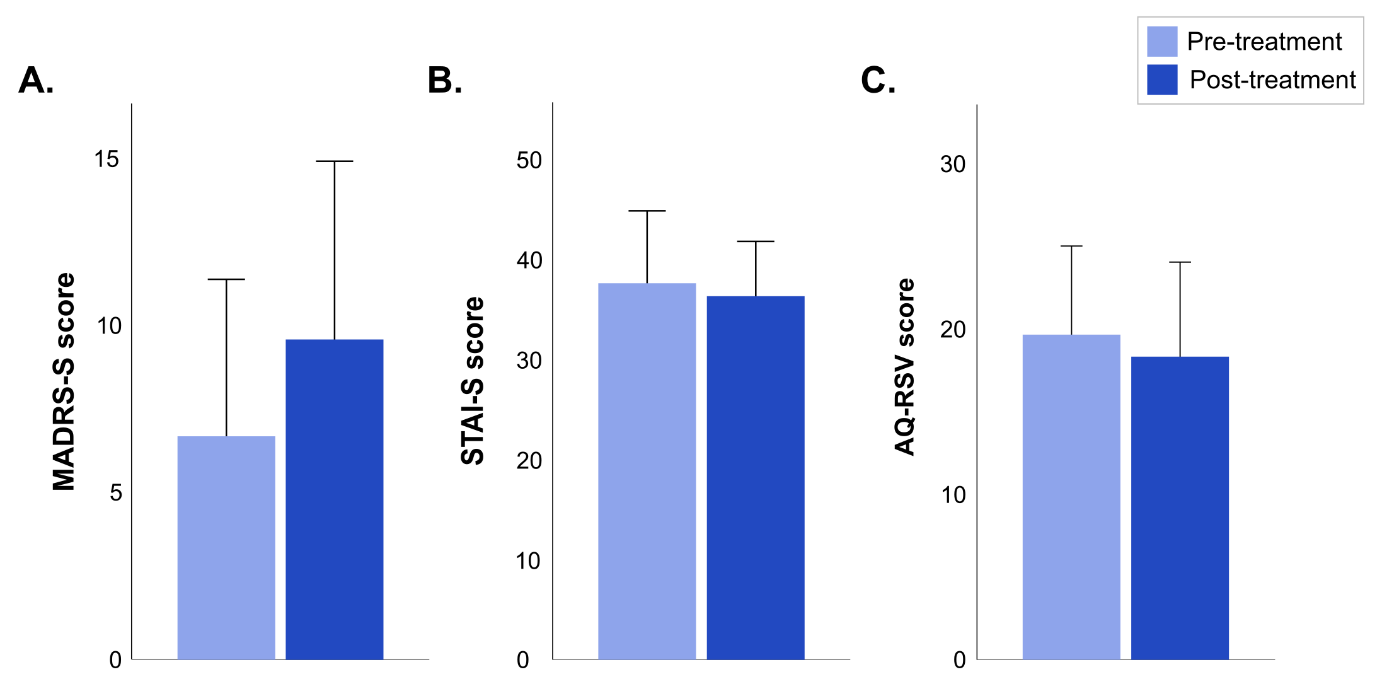


**Figure S1. Effect of low-dose testosterone administration on psychometrics.** Bar graphs of **A.** MADRS-S, **B.** STAI-S and **C.** AQ-RSV scores collected during scanning sessions, before (pre-treatment) and after one-week of transdermal testosterone treatment (post-treatment). The error bars represent 2x standard error of the mean.
